# Supplementary material for: NiMoS on alumina-USY zeolites for hydrotreating lignin dimers: effect of support acidity and cleavage of C–C bonds
Source: Royal Society of Chemistry journal article supplement (doi:10.1039/c9se00507b), 2019-10-08

## Electronic Supplementary Information (ESI)

### NiMoS on alumina-USY zeolite for hydrotreating lignin dimers: Effect of support acidity and cleavage of C-C bond

Muhammad Abdus Salam,<sup>ab</sup> Prakhar Arora,<sup>a</sup> Houman Ojagh,<sup>a</sup> You Wayne Cheah,<sup>a</sup> Louise Olsson,<sup>\*a</sup> and Derek Creaser<sup>a</sup>

<sup>a</sup> *Chemical Engineering, Competence Centre for catalysis, Chalmers University of Technology*

<sup>b</sup> *Department of Chemical Engineering and Polymer Science, Shahjalal University of Science and Technology, Sylhet-3114, Bangladesh; salam-cep@sust.edu*

**Fig.S1.** Product selectivity's during HDO of BPE over (a) NiMoA, (b) NiMoAY and (c) NiMoY

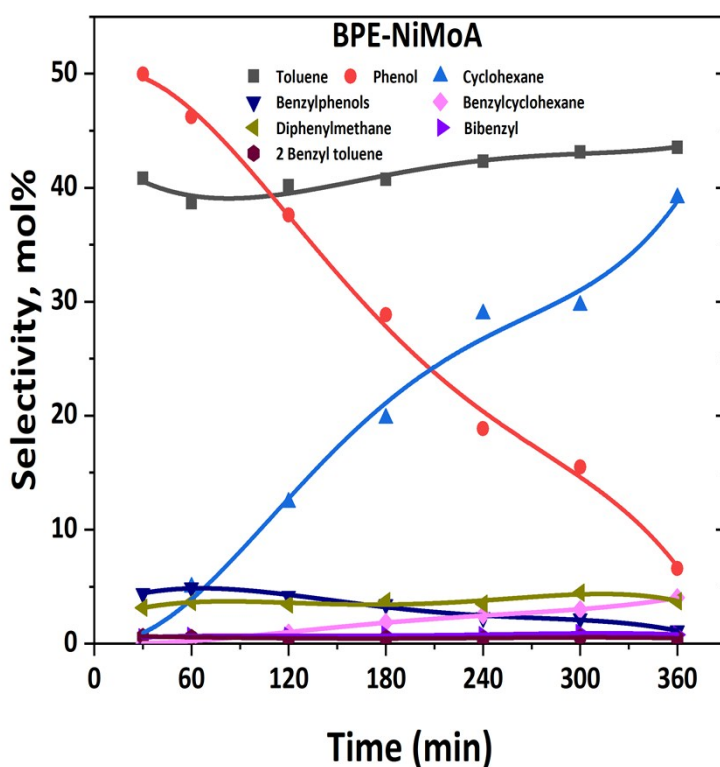

(a)

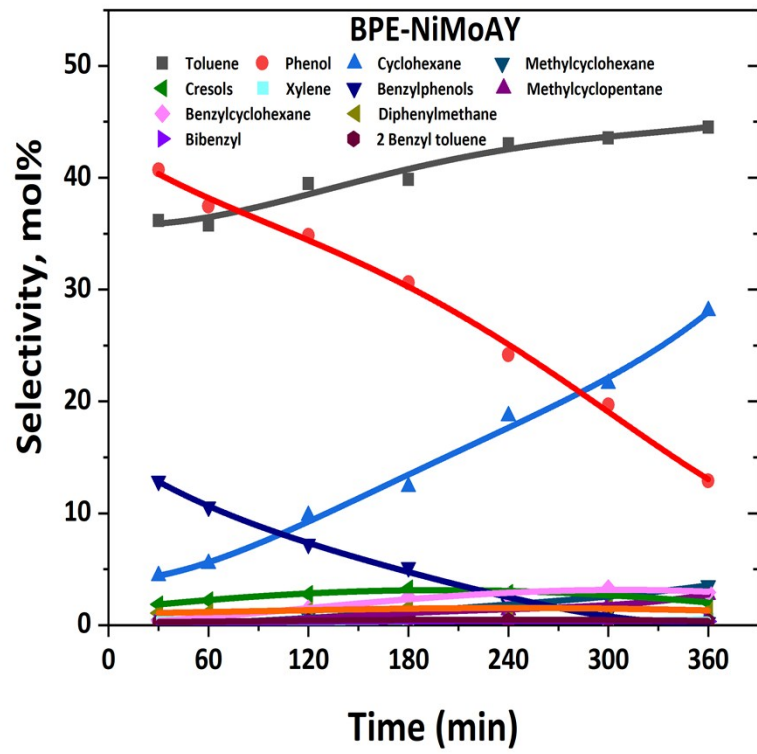

(b)

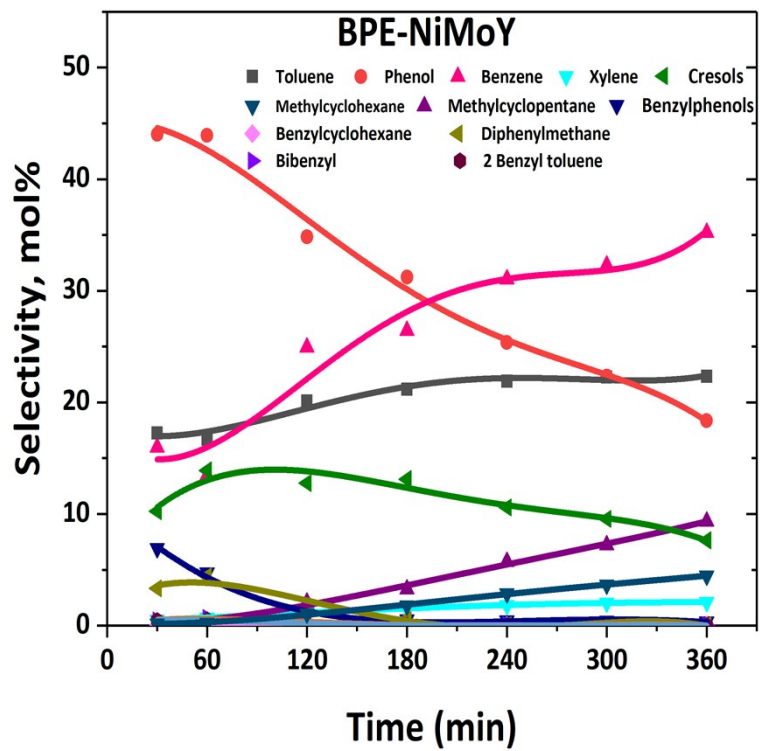

(c)

Fig.S2. Product selectivity's during HDO of PPE over (a) NiMoA, (b) NiMoAY and (c) NiMoY

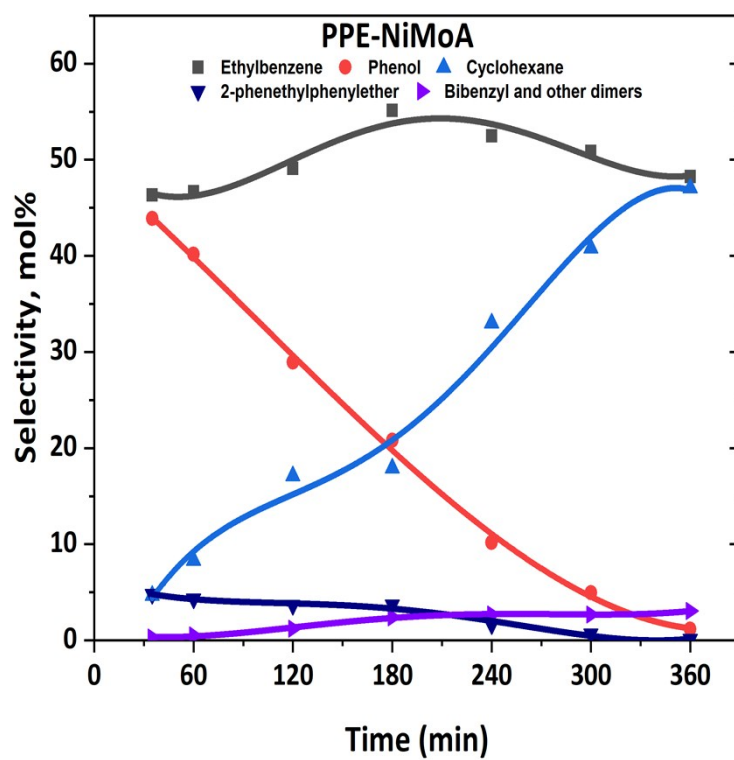

(a)

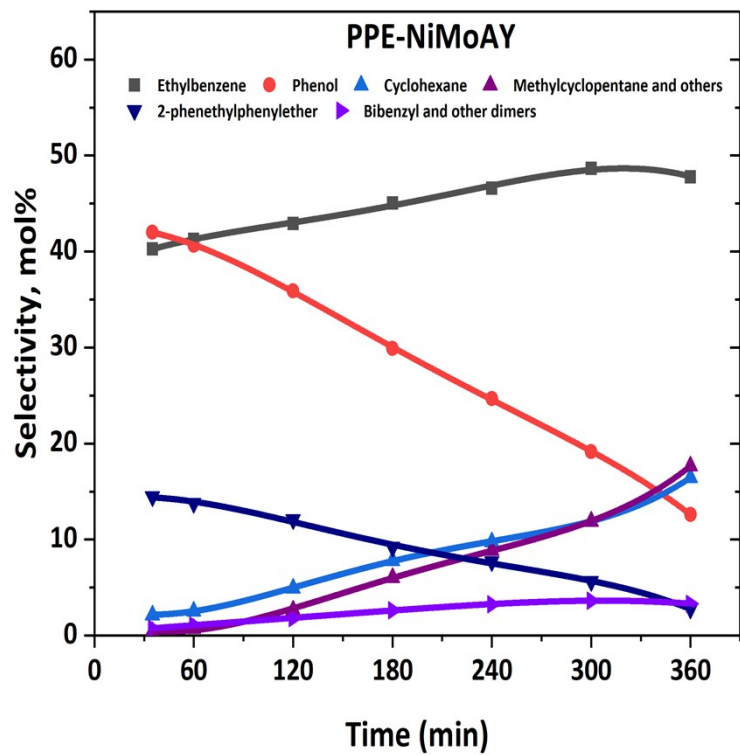

(b)

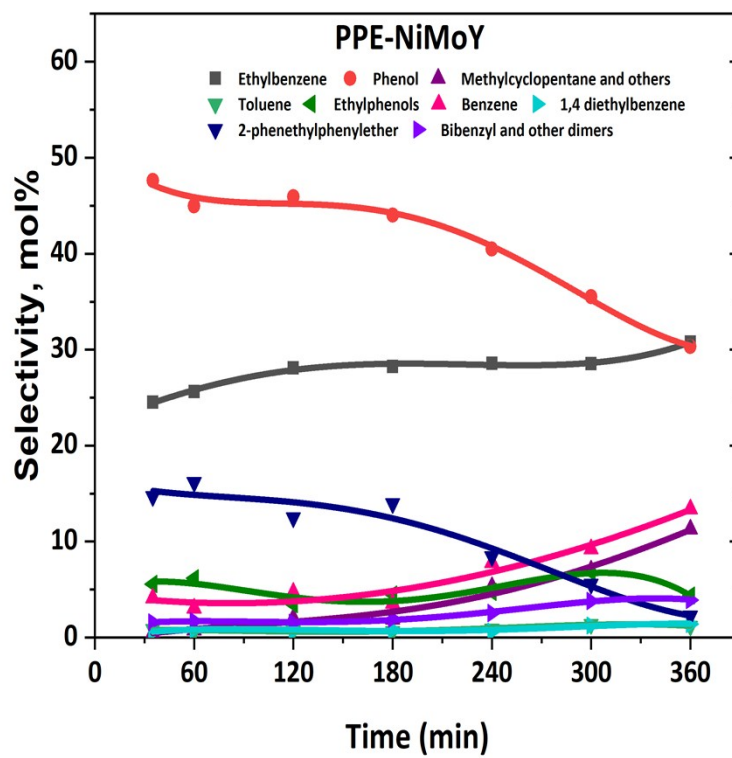

(c)

Fig.S3. Product selectivity's during HDO of 2,2'Biphenol over USY only

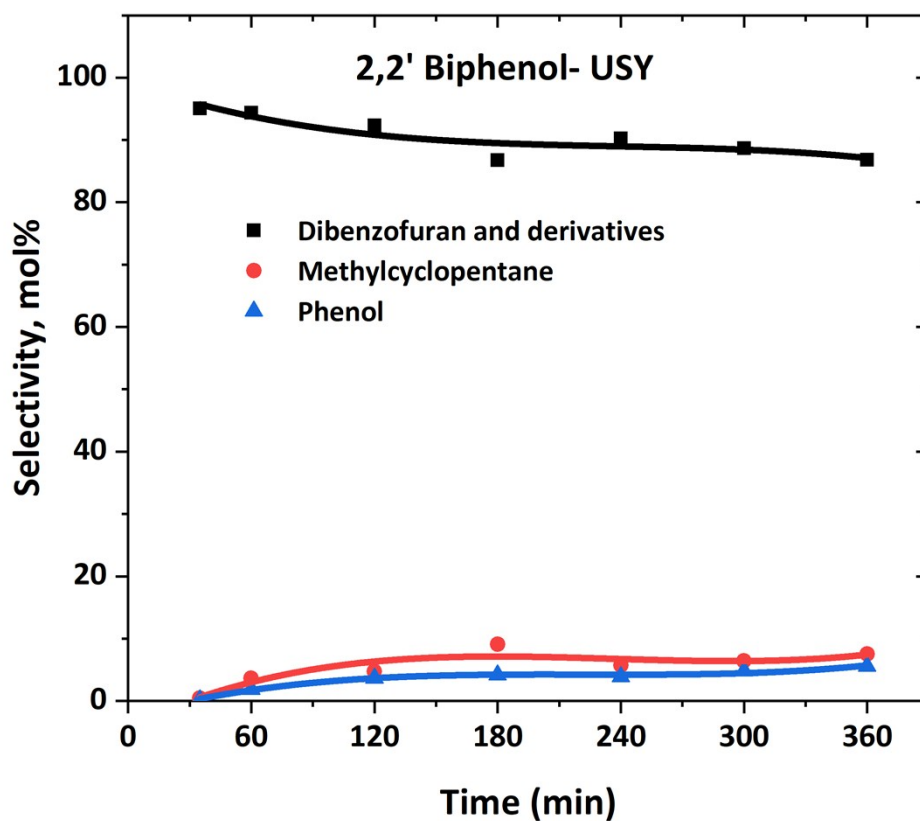

Fig.S4. Product selectivity's during repeated experiments of HDO of 2,2'Biphenol over NiMoY

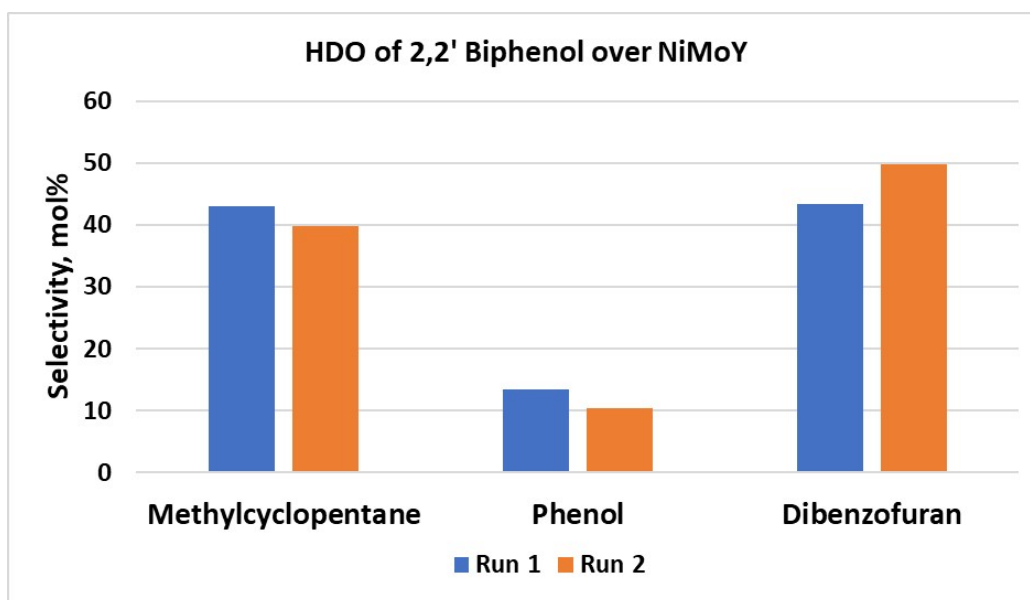

Supplement: c9se00507b1.pdf [file c9se00507b1.pdf]
